# Supplementary material for: A comprehensive evaluation of the sl1p pipeline for 16S rRNA gene sequencing analysis
Source: PubMed Central journal article supplement (PMC5557527; doi:10.1186/s40168-017-0314-2), 2017-08-14
Supplement: 40168_2017_314_MOESM1_ESM.pdf [file 40168_2017_314_MOESM1_ESM.pdf]

usage: s1p.pl [-E of fofns] [-l of fofns] [-p <project name>] [-r region] [-s seq info file] [-b barcode location] [-u threads] [-f force overwrite] [-q quality threshold] [-m chimera checking] [-p OTU picking algorithm] [-c OTU picking threshold] [-l linkage method] [-t taxonomic assignment method] [-d reference database] [-x timed]

**input parameters**  
 -r region of 16S [v3/v34/other] (default: v3)  
 -s seq info file to use with -r other (default: none)  
 -b location of barcode on sequence [fwd/rev] (default: fwd)  
 -u number of threads [1-9] (default: 1)  
 -f force overwrite output from previous runs [y/n] (default: n)

**quality filtering**  
 -q quality threshold [0-40] (default: 30)  
 -m chimera checking [y/n] (default: y)

**OTU clustering**  
 -p OTU picking algorithm [abundantotu/uclust/cdhit/dnaclus/uclust-ref/uclust-ref-strict/mothur/blast/uparse/all]  
 -c OTU picking clustering threshold [0-100] (default: 97)  
 -l linkage method to use with -c mothur

**taxonomic assignment**  
 -t taxonomic assignment method [blast/rdp-training/all] (default: rdp-training)  
 -d reference database [gg2011/gg2013/silva111/all] (default: gg2011)

**output parameters**  
 -x output CPU timing of each data processing step [y/n] (default: n)

**main()**

**assess command line options & usage**  
 setup log & error files  
 check for necessary software install & version compatibility  
 ensure illumina naming scheme  
 output software version info to log file

**quality filtering**  
 generate mapping file (perl)  
 trim away primers (cutadapt)  
 align paired-end reads (pandaseq)  
 cull any seq with illumina sequencing primers (cutadapt)  
 trim aligned read pairs based on Sq (sickle)  
 adjust barcodes if necessary (perl)  
 consolidate fast datasets (perl)  
 check mapping file (qiime)  
 if \$m == yes -  
 output read counts at each stage of qual filtering  
 (seq\_log\_info.txt)

**OTU picking**  
 if p == abundantOTU  
 p == uclust  
 p == cdhit  
 p == dnaclus  
 p == blast  
 p == mothur  
 p == uclust-ref  
 p == uclust-ref-strict  
 p == uparse  
 p == ALL

**taxonomic assignment**  
 for each combination of \$clust & \$sgg  
 if t == blast  
 t == rdp-training  
 t == ALL

**outputs**  
 for each combination of \$clust & \$sgg  
 align\_seqs  
 filter\_alignment  
 make\_phylogeny  
 make\_ggpruned

for each combination of \$clust, \$sgg, & \$taxon  
 filter\_otus  
 removeRoot  
 summarize\_taxa

alpha\_div  
 beta\_div  
 RAnalysis  
 cleanUp

**output:**  
 log\_seq\_info.txt  
 log\_s1p\_<Date>.log  
 .err  
 map\_aux.tar.gz  
 map\_<Proj>.txt  
 pandaseq\_logs/  
 picked\_otus\_<clust>.<db>/  
 align\_<db>\_filtered.tar.gz  
 align\_<db>\_tar.gz  
 <gg>\_<dis>\_pruned.tre  
 library\_stats\_<taxon>\_<gg>\_n1\_noRoot.txt  
 library\_stats\_<taxon>\_<gg>.txt  
 otus\_aux.tar.gz  
 otu\_table\_<taxon>\_<gg>.biom  
 otu\_table\_<taxon>\_<gg>\_n1\_noRoot.biom  
 otu\_table\_<taxon>\_<gg>\_n1\_noRoot\_relAbund.txt  
 otu\_table\_<taxon>\_<gg>\_n1\_noRoot.txt  
 otu\_table\_<taxon>\_<gg>.txt  
 phylo\_aux.tar.gz  
 <taxon>\_<db>\_assigned\_taxonomy\_tr.tar.gz  
 rep\_set\_aux.tar.gz  
 seqs\_<db>\_otus.txt.tar.gz  
 s1p\_analysis.html  
 s1p\_analysis.Rmd  
 wf\_taxa\_summary\_<taxon>\_<db>  
 wf\_taxa\_summary\_<taxon>\_<db>\_n1\_noRoot  
 <Proj>.fna.tar.gz  
 qiime\_params.txt  
 s1p\_dir.tar.gz

**getPrimers()**  
 if v3, v34  
 set hardcoded vars  
 else read in from file  
 return (set fwd, rev, min,  
 & max length)

**chimera\_check.py**  
 identify\_chimeric\_seqs.py  
 with -m usearch61 union  
 between ref & de novo  
 against -d  
 filter chimeric seqs from  
 fna input

**abundantOTU()**  
 AbundantOTU+ -d \$dis  
 perl helper abundantOTU.  
 to\_qiime to format

**uclust()**  
 pick\_otus.py -m uclust  
 -s \$dis  
 pick\_rep\_set.py -m  
 most\_abundant

**cdhit()**  
 pick\_otus.py -m cdhit  
 -s \$dis  
 pick\_rep\_set.py -m  
 most\_abundant

**dnaclus()**  
 dnaclus -s \$dis  
 perl helper editDnaclus-  
 ForQIime.pl to format  
 pick\_rep\_set.py -m  
 most\_abundant

**blast()**  
 pick\_otus.py -m uclust  
 -s \$dis  
 pick\_rep\_set.py -m  
 most\_abundant

**qiime\_mothur()**  
 align\_seqs.py  
 pick\_otus.py -m mothur  
 pick\_rep\_set.py -m  
 most\_abundant

**uclust\_ref()**  
 pick\_otus.py -m uclust\_ref  
 -C  
 pick\_rep\_set.py -m  
 most\_abundant

**uclust\_ref\_strict()**  
 pick\_otus.py -m uclust\_ref  
 -C  
 pick\_rep\_set.py -m  
 most\_abundant

**uparse()**  
 search -derep\_fulllength  
 search -sortbysize  
 search -cluster\_otus  
 search -search\_global  
 perl helper script edit-  
 UPARSEForQIime for  
 format

**taxa\_blast.py**  
 assign\_taxonomy.py -m  
 blast -r \$db -t \$db

**taxa\_rdp.py**  
 assign\_taxonomy.py -m  
 rdp -c 0.5 -r \$db -t \$db  
 t == ALL

**align\_seq()**  
 align\_seqs.py -m pyblast  
 -t uclust -p 0.75

**filter\_alignment()**  
 filter\_alignment.py

**make\_phylogeny()**  
 make\_phylogeny()

**make\_ggpruned()**  
 -perl to calculate all taxa in  
 dataset  
 -prune 3db phylogeny to  
 appropriate taxa  
 format branch names

**make\_otu\_table()**  
 make\_otu\_table.py

**filter\_otus()**  
 -use filter\_otus\_from\_otu  
 \_table.py to filter singletons  
 (-n 2) and doubletons (-n 3)  
 into appropriately named  
 output otu tables.  
 -biom convert to create  
 .txt versions

**removeRoot()**  
 -perl auxiliary script to  
 remove any otu not  
 assigned to bacteria from  
 .txt  
 -biom convert to create  
 biom version

**summarize\_taxa()**  
 summarize\_taxa\_through  
 \_plots.py

**alpha\_div()**  
 alpha\_rarefaction.py

**beta\_div()**  
 calculate the min read count  
 in dataset  
 -uses pruned tree if pro-  
 duced (gg2011/13); other-  
 wise uses rep\_phylo.tre  
 -beta\_diversity\_through\_  
 plots.py -e min

**RAnalysis()**  
 -call to R to generate Rmd  
 with read counts, taxa  
 summaries, alpha- &  
 beta-diversity outputs  
 -create R output for user  
 to start analysis

**cleanUp()**  
 -delete intermediary files  
 -compress important  
 intermediaries
