# Supplementary material for: A comprehensive evaluation of the sl1p pipeline for 16S rRNA gene sequencing analysis
Source: PubMed Central journal article supplement (PMC5557527; doi:10.1186/s40168-017-0314-2), 2017-08-14

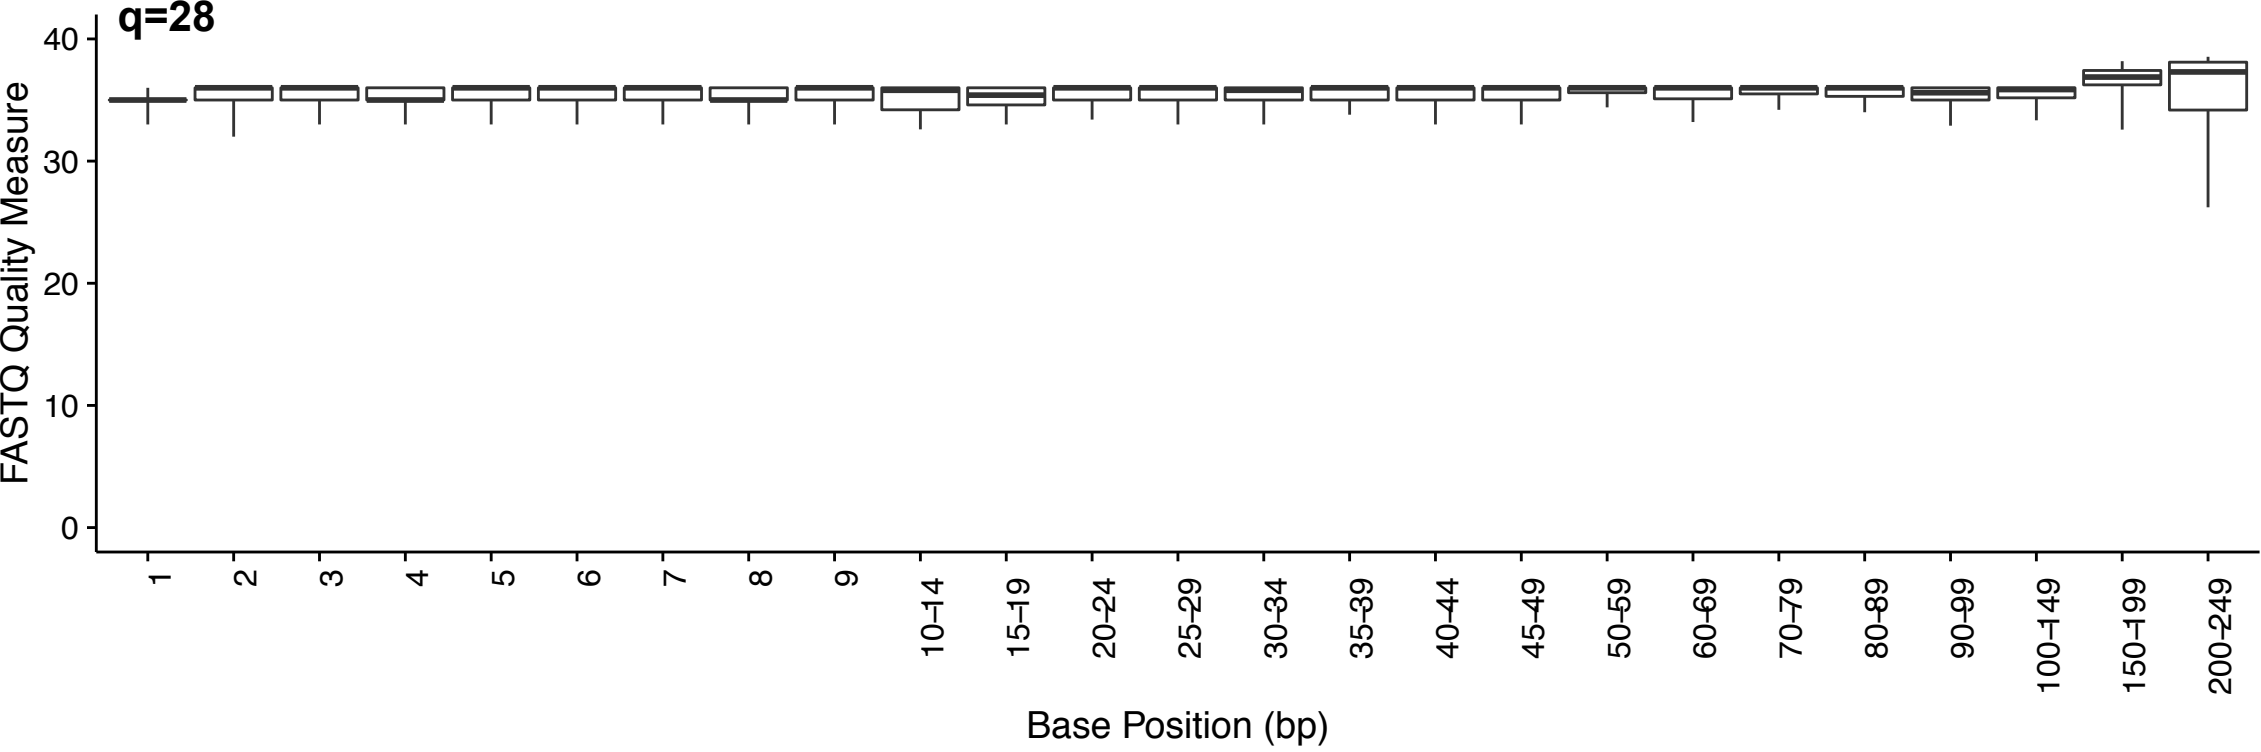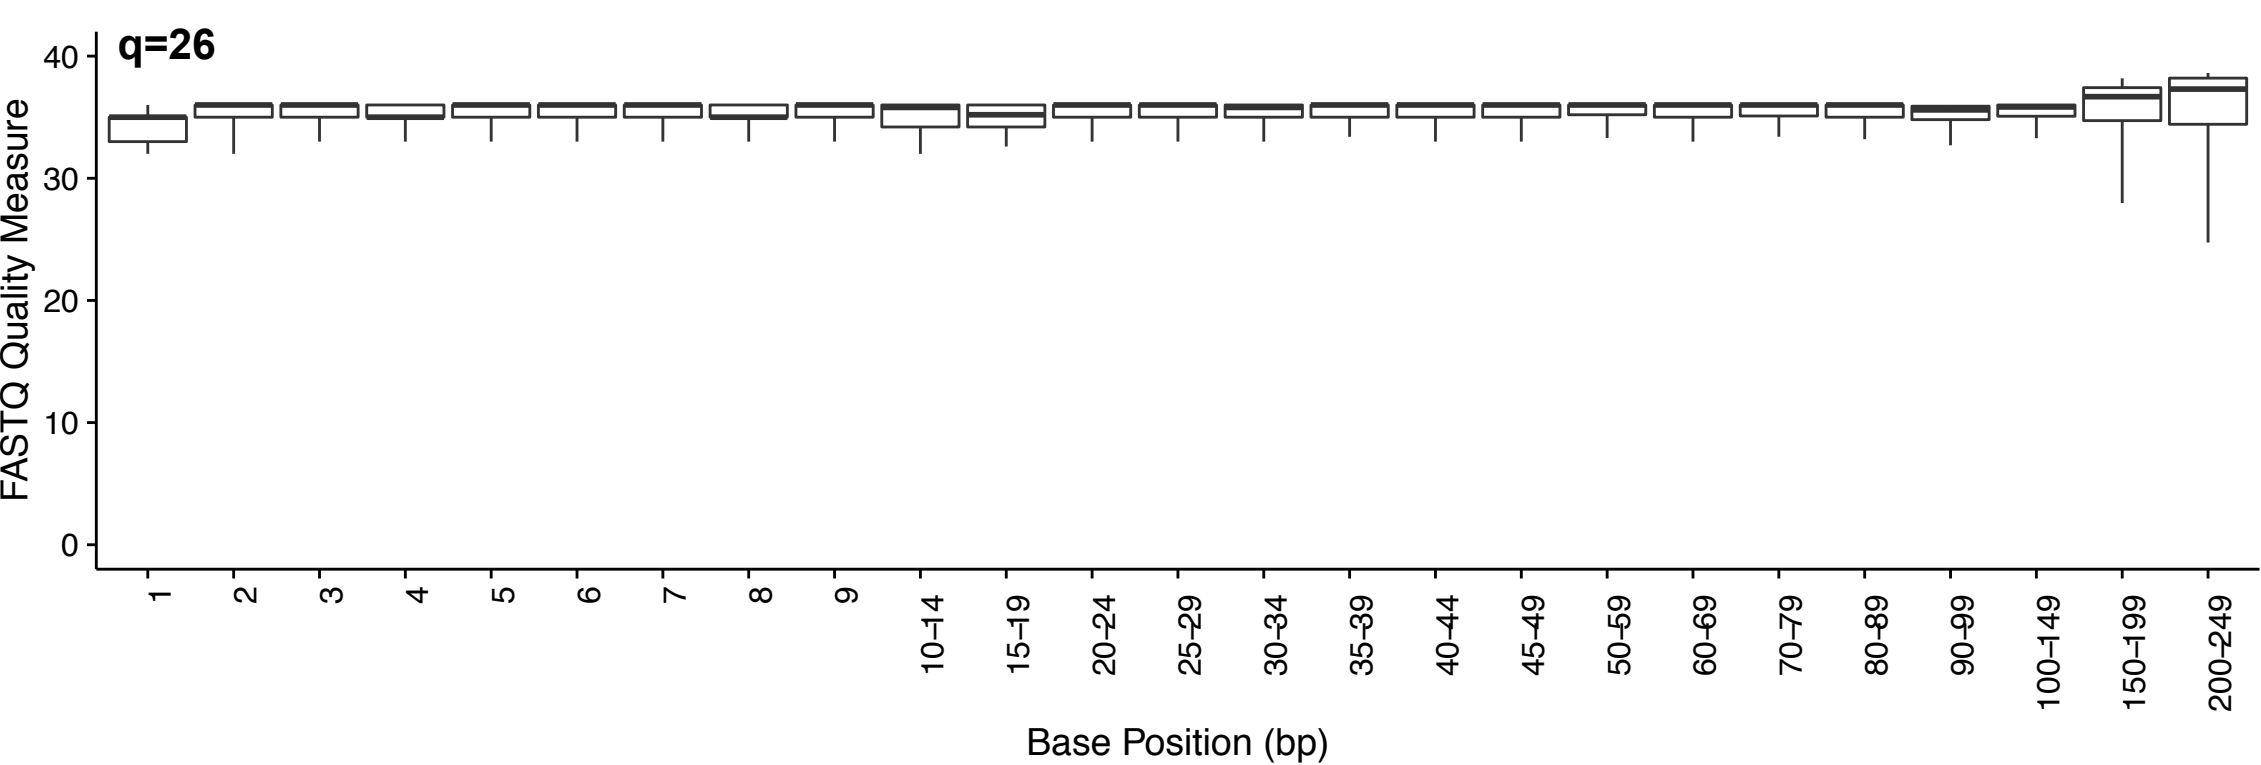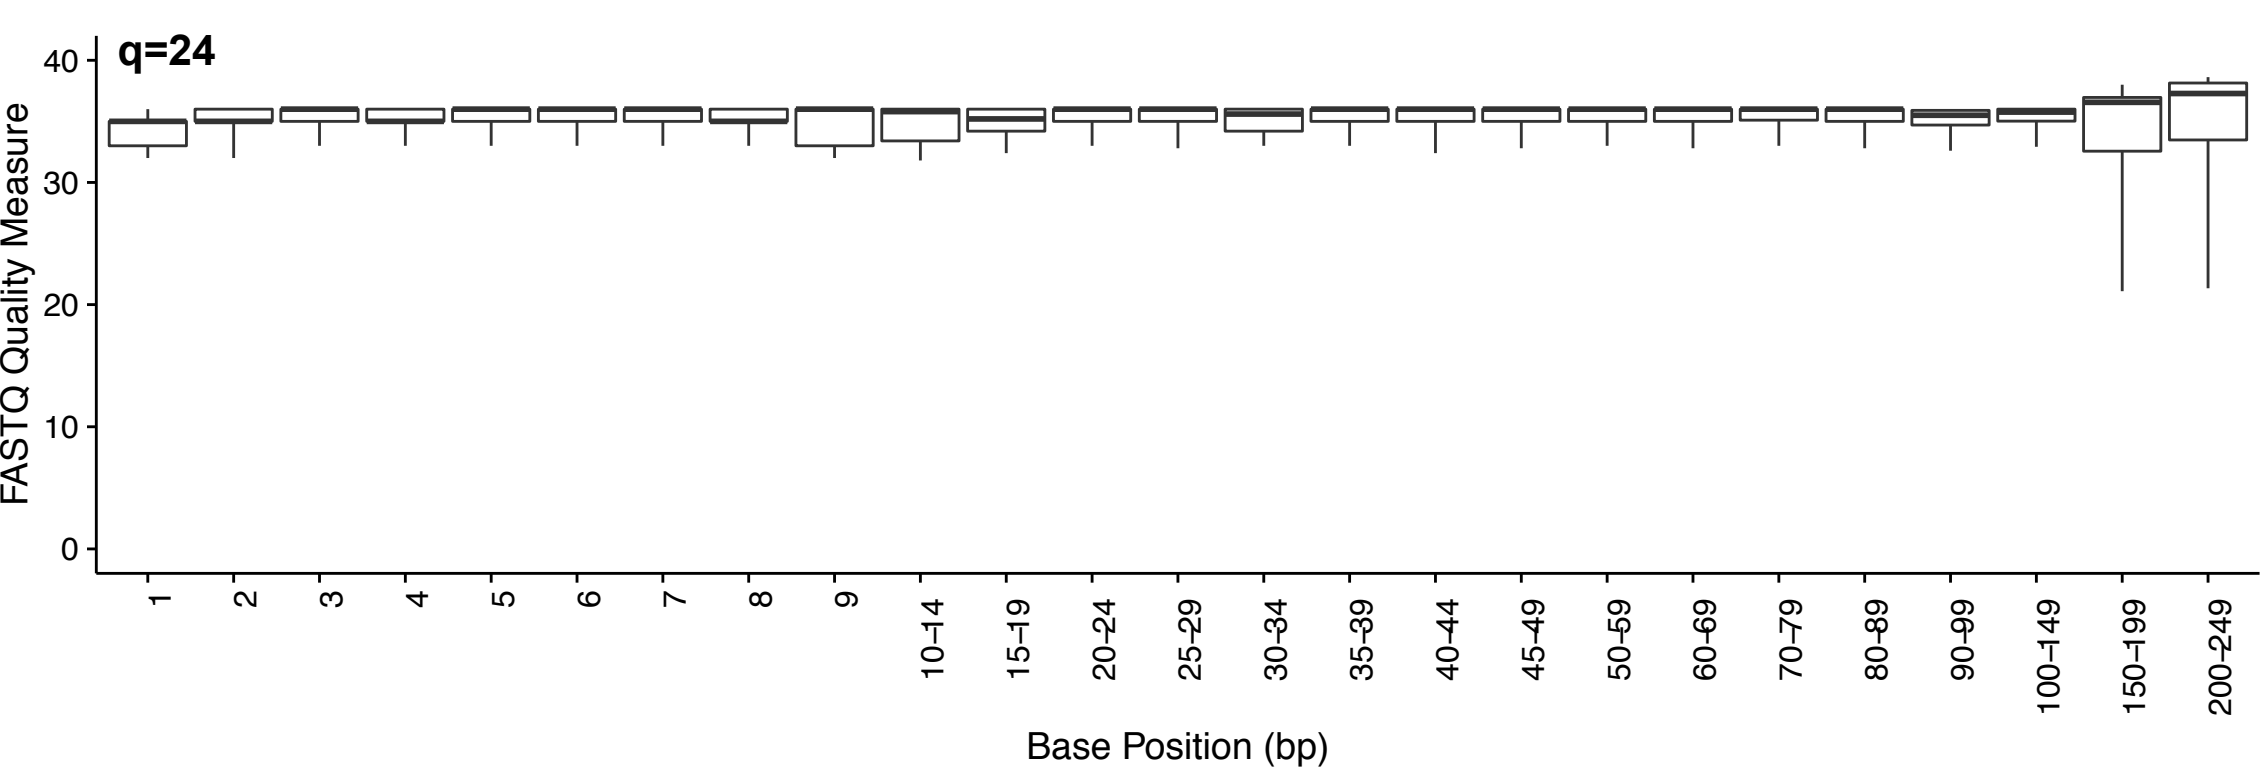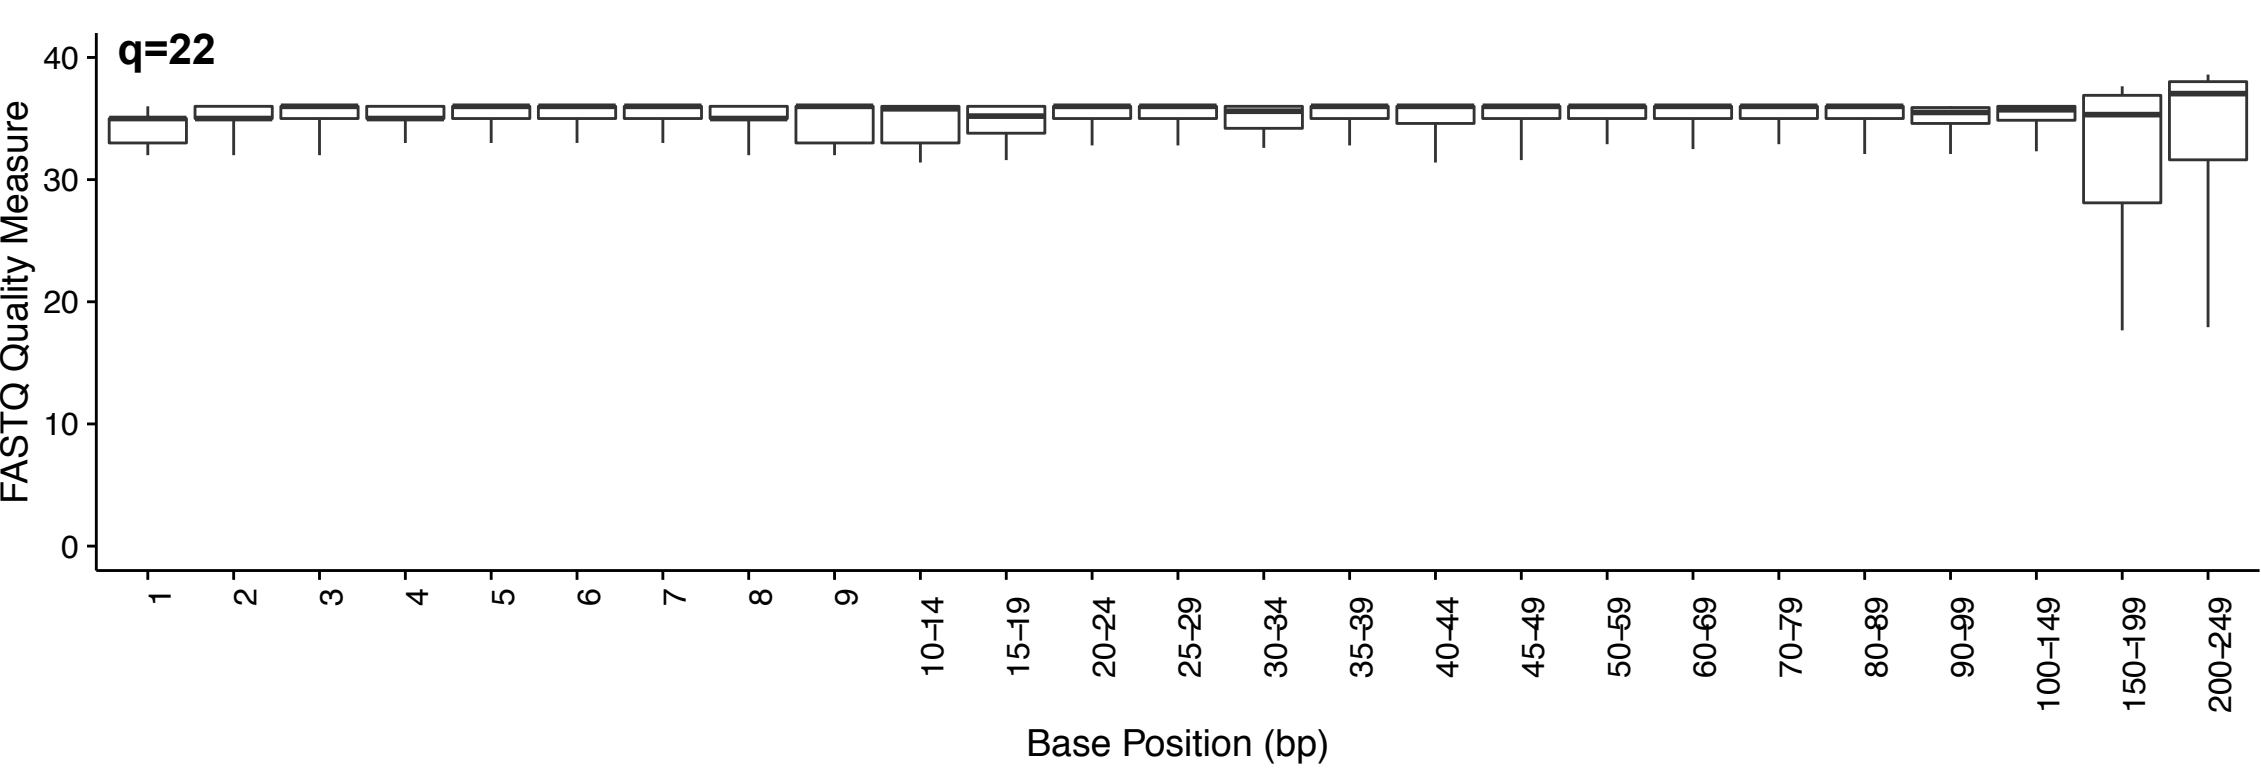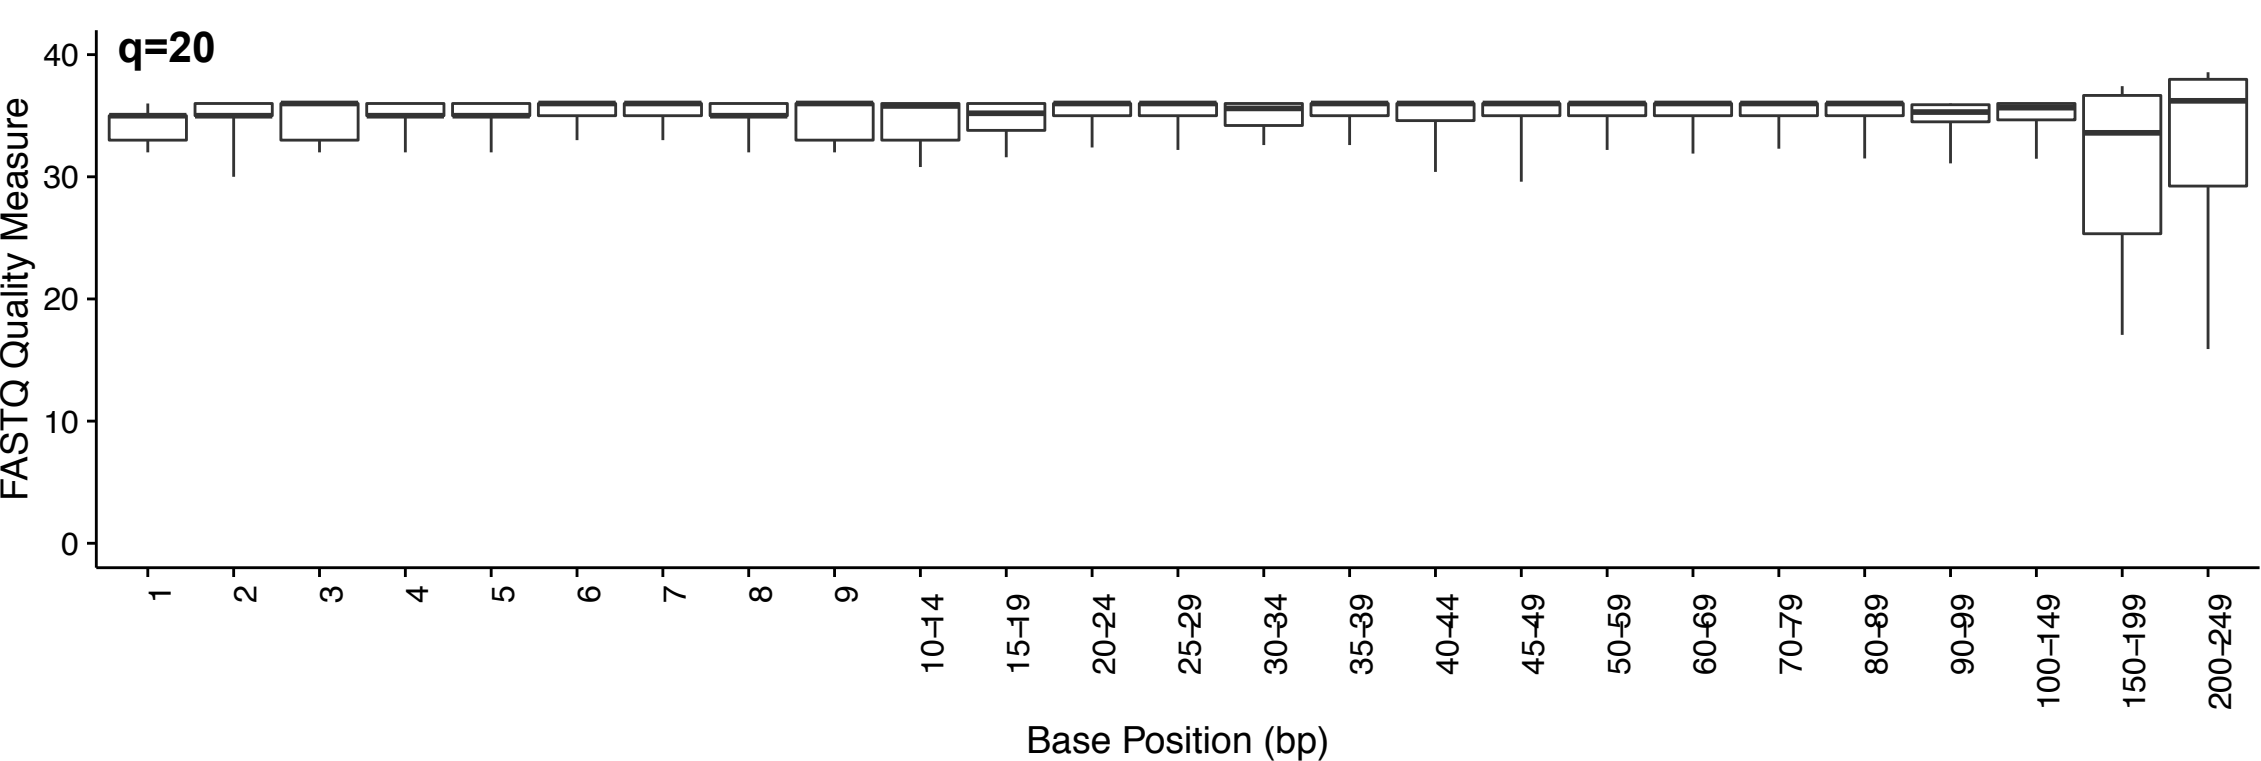

Supplement: 40168_2017_314_MOESM5_ESM.pdf [file 40168_2017_314_MOESM5_ESM.pdf]
