# Supplementary material for: A comprehensive evaluation of the sl1p pipeline for 16S rRNA gene sequencing analysis
Source: PubMed Central journal article supplement (PMC5557527; doi:10.1186/s40168-017-0314-2), 2017-08-14

# of picked OTUs

**OTU Picking Approach**  
AbundantOTU BLAST cdhit dnaclust  
UCLUST UCLUST-ref UCLUST-ref-strict UPARSE

**Taxonomic Database**  
Greengenes 2011 GreenGenes 2013 Silva 111

# of picked OTUs

# of picked OTUs

HMP1, n=2

HMP1, n=3

HMP1, n=4

HMP1, n=5

HMP1, n=10

HMP2, n=2

HMP2, n=3

HMP2, n=4

HMP2, n=5

HMP2, n=10

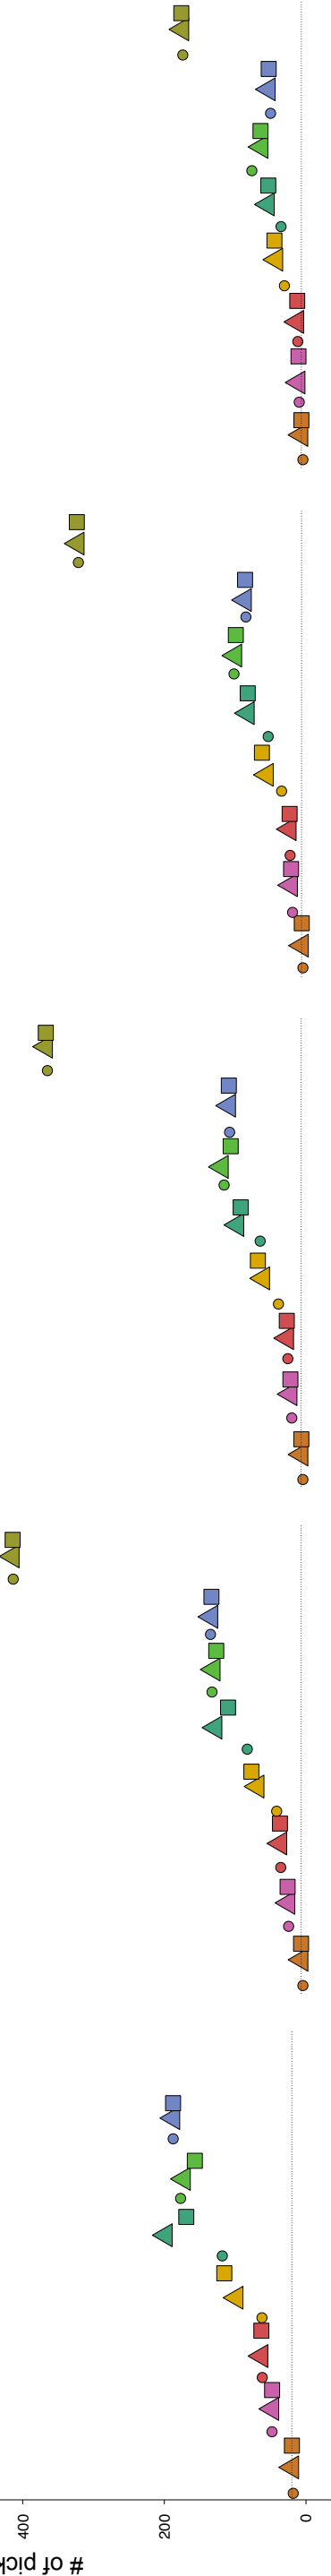

HMP1, n=2

HMP1, n=3

HMP1, n=4

HMP1, n=5

HMP1, n=10

HMP2, n=2

HMP2, n=3

HMP2, n=4

HMP2, n=5

HMP2, n=10

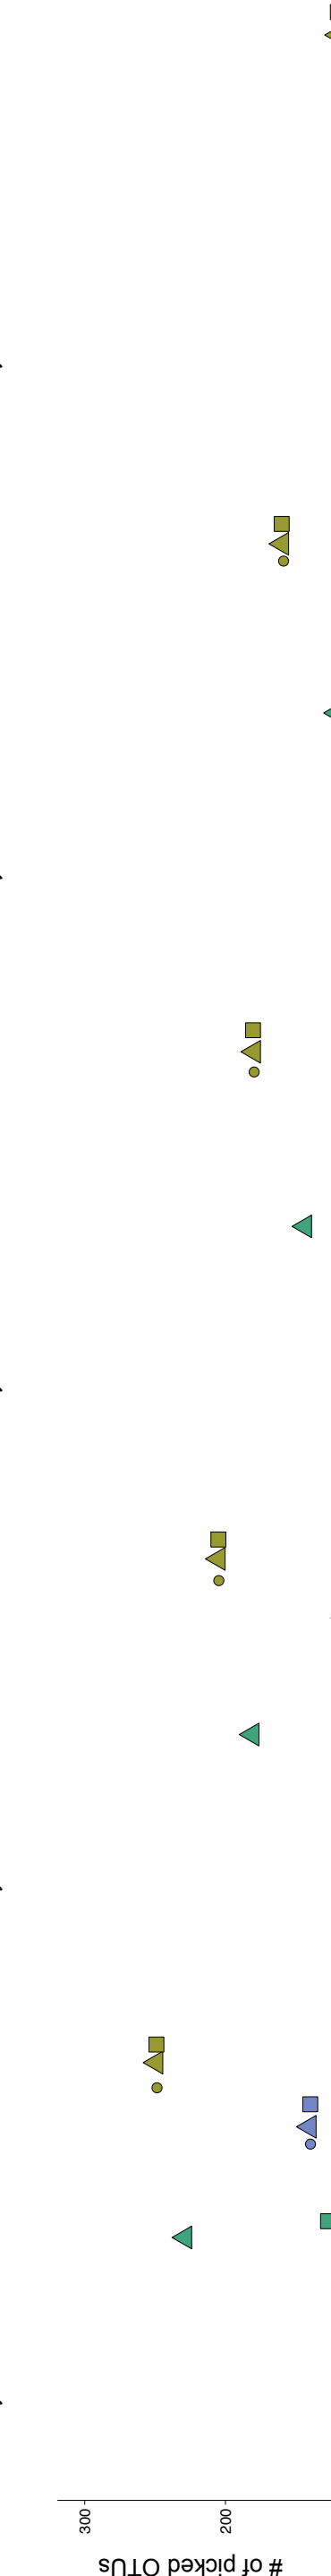

Supplement: 40168_2017_314_MOESM10_ESM.pdf [file 40168_2017_314_MOESM10_ESM.pdf]
