# Supplementary material for: A comprehensive evaluation of the sl1p pipeline for 16S rRNA gene sequencing analysis
Source: PubMed Central journal article supplement (PMC5557527; doi:10.1186/s40168-017-0314-2), 2017-08-14
Supplement: 40168_2017_314_MOESM12_ESM.pdf [file 40168_2017_314_MOESM12_ESM.pdf]

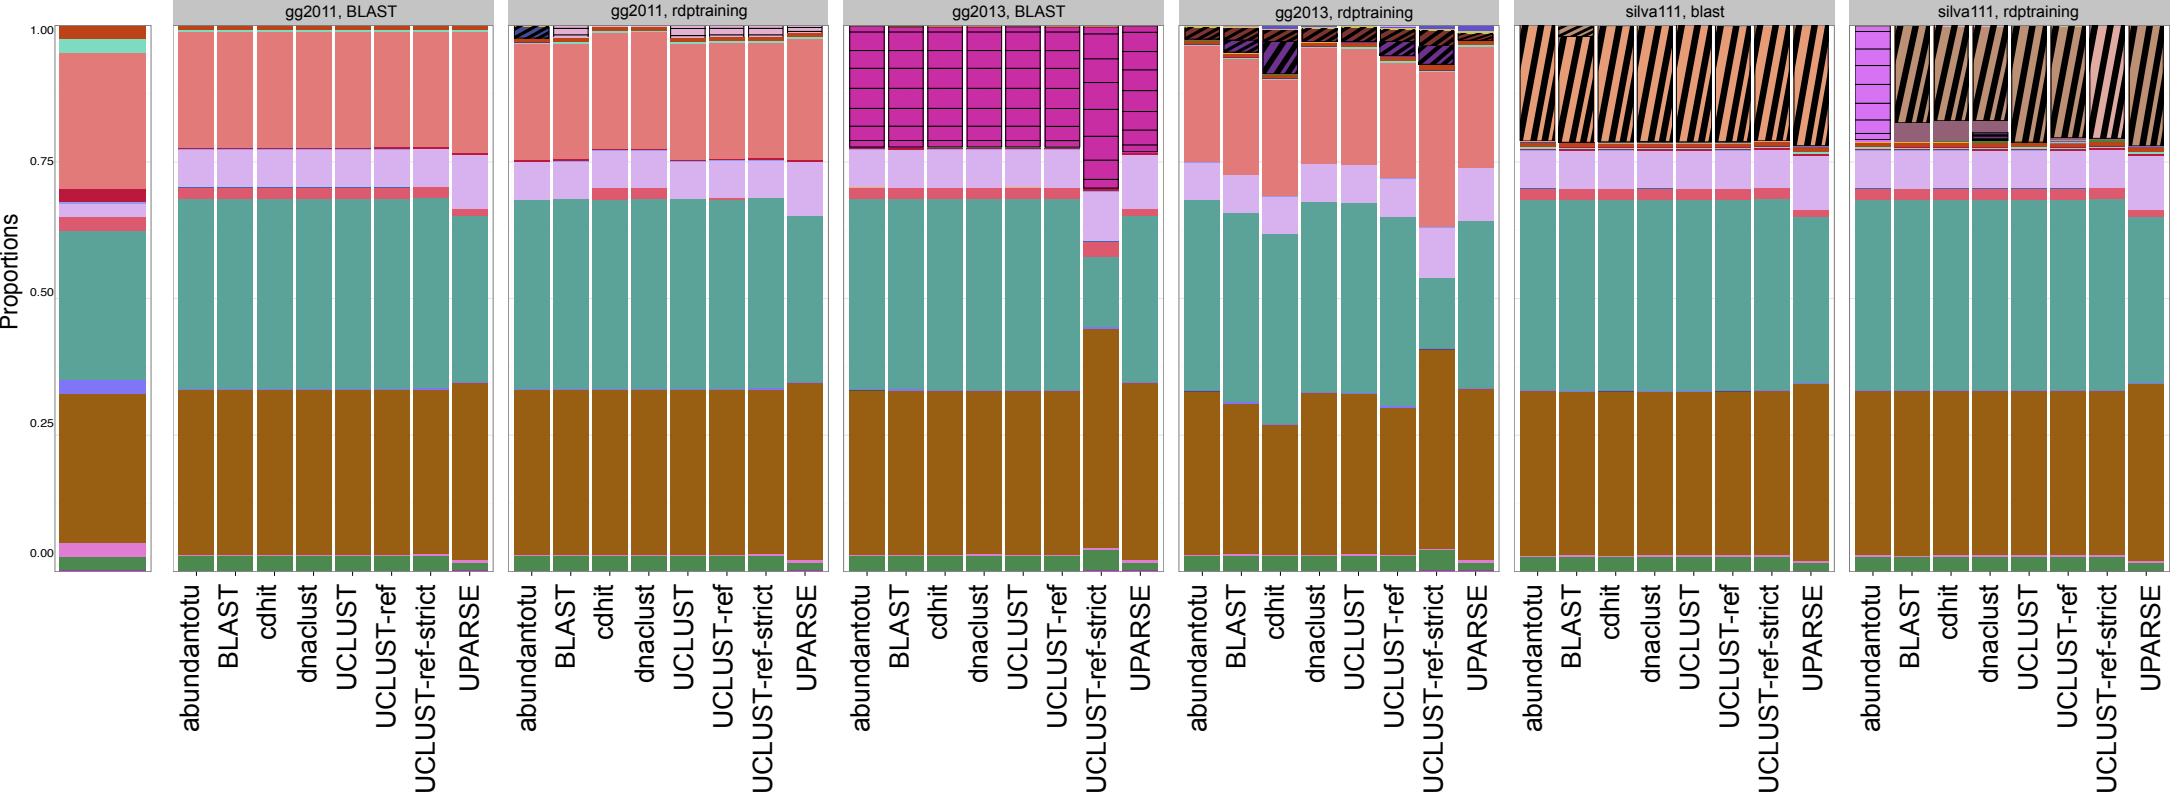

Taxa

- No.blast.hit.Other.Other.Other.Other
- Bacteria.Actinobacteria.Actinobacteria.Actinomycetales.Actinomycetaceae.Actinomyces
- Bacteria.Actinobacteria.Actinobacteria.Actinomycetales.Propionibacteriaceae.Propionibacterium
- Bacteria.Bacteroidetes.Bacteroidia.Bacteroidales.Bacteroidaceae.Bacteroides
- Bacteria.Firmicutes.Bacilli.Bacillales.Bacillaceae.Bacillus
- Bacteria.Firmicutes.Bacilli.Bacillales.Listeriaceae.Listeria
- Bacteria.Firmicutes.Bacilli.Bacillales.Staphylococcaceae.Staphylococcus
- Bacteria.Firmicutes.Bacilli.Lactobacillales.Enterococcaceae.Enterococcus
- Bacteria.Firmicutes.Bacilli.Lactobacillales.Lactobacillaceae.Lactobacillus
- Bacteria.Firmicutes.Bacilli.Lactobacillales.Streptococcaceae.Streptococcus
- Bacteria.Firmicutes.Clostridia.Clostridiales.Clostridiaceae.Clostridium
- Bacteria.Firmicutes.Clostridia.Clostridiales.Veillonellaceae.Selenomonas
- Bacteria.Firmicutes.Clostridia.Clostridiales.Veillonellaceae.Veillonella
- Bacteria.Firmicutes.Clostridia.OPB54..
- Bacteria.Proteobacteria.Alphaproteobacteria.Rhodobacterales.Rhodobacteraceae.Rhodobacter
- Bacteria.Proteobacteria.Betaproteobacteria.Neisseriales.Neisseriaceae.Neisseria
- Bacteria.Proteobacteria.Epsilonproteobacteria.Campylobacterales.Helicobacteraceae.Helicobacter
- Bacteria.Proteobacteria.Gammaproteobacteria.Enterobacteriales.Enterobacteriaceae.Escherichia
- Bacteria.Proteobacteria.Gammaproteobacteria.Pseudomonadales.Moraxellaceae.Acinetobacter
- Bacteria.Proteobacteria.Gammaproteobacteria.Pseudomonadales.Moraxellaceae.Moraxella
- Bacteria.Proteobacteria.Gammaproteobacteria.Pseudomonadales.Pseudomonadaceae.Pseudomonas
- Bacteria.Firmicutes.Bacilli.Lactobacillales.Enterococcaceae.
- Bacteria.Firmicutes.Clostridia.Clostridiales..
- Bacteria.Proteobacteria.Deltaproteobacteria.Desulfovibrionales.Desulfovibrionaceae.Desulfovibrio
- Bacteria.Proteobacteria.Gammaproteobacteria.Enterobacteriales.Enterobacteriaceae.
- Bacteria.Proteobacteria.Gammaproteobacteria.Pseudomonadales.Moraxellaceae.
- Bacteria..Thermi..Deinococci.Deinococcales.Deinococcaceae.Deinococcus
- Bacteria.Actinobacteria.Actinobacteria.Propionibacteriales.Propionibacteriaceae.Propionibacterium
- Bacteria.Firmicutes.Clostridia.Clostridiales.Clostridiaceae.Sarcina
- Bacteria.Firmicutes.Clostridia.Clostridiales.OPB54.
- Bacteria.Proteobacteria.Alphaproteobacteria.Rhizobiales.Phylobacteriaceae.Phylobacterium
- Bacteria.Proteobacteria.Gammaproteobacteria.Enterobacteriales.Enterobacteriaceae.Enterobacter
- Bacteria.Other.Other.Other.Other.Other
- Bacteria.Firmicutes.Bacilli.Lactobacillales.Other.Other
- Bacteria.Firmicutes.Bacilli.Lactobacillales.Streptococcaceae.Other
- Bacteria.Firmicutes.Clostridia.Other.Other.Other
- Bacteria.Firmicutes.Clostridia.Clostridiales.Other.Other
- Bacteria.Proteobacteria.Gammaproteobacteria.Enterobacteriales.Enterobacteriaceae.Other
- Bacteria.Firmicutes.Other.Other.Other.Other
- Bacteria.Firmicutes.Bacilli.Gemellales..
- Bacteria.Firmicutes.Clostridia.Clostridiales.Clostridiaceae.02d06
- Bacteria.Proteobacteria.Epsilonproteobacteria.Campylobacterales.Helicobacteraceae.Flexispira
- Bacteria.Proteobacteria.Gammaproteobacteria.Other.Other.Other
- Bacteria.Proteobacteria.Gammaproteobacteria.Enterobacteriales.Enterobacteriaceae.Escherichia.Shigella
- Bacteria.Firmicutes.Bacilli.Bacillales.Bacillaceae.
- Bacteria.Firmicutes.Clostridia.Clostridiales.Clostridiaceae.
- Bacteria.Firmicutes.Clostridia.Clostridiales.Lachnospiraceae.Epulumiscium
- Bacteria.Proteobacteria.Gammaproteobacteria.Aeromonadales.Aeromonadaceae.
- Bacteria.Bacteroidetes.Bacteroidia.Bacteroidales.Porphyrimonadaceae.Barnesiella
- Bacteria.Proteobacteria.Gammaproteobacteria.B38..
- Bacteria.Firmicutes.Clostridia.Clostridiales.Clostridiaceae.Other
- Bacteria.Firmicutes.Bacilli.Other.Other.Other
- Bacteria.Proteobacteria.Gammaproteobacteria.Enterobacteriales.Enterobacteriaceae.Erwinia
- Bacteria.Proteobacteria.Alphaproteobacteria.Rhodobacterales.Rhodobacteraceae.Other
- Bacteria.Firmicutes.Bacilli.Bacillales.Planococcaceae.
- Bacteria.Firmicutes.Bacilli.Lactobacillales.Streptococcaceae.Lactococcus
- Bacteria.Proteobacteria.Gammaproteobacteria.B38.f.g
- Taxa < 1%
- Correct assignment but above the genus level
- Wrong taxonomic assignment
