# Supplementary material for: A comprehensive evaluation of the sl1p pipeline for 16S rRNA gene sequencing analysis
Source: PubMed Central journal article supplement (PMC5557527; doi:10.1186/s40168-017-0314-2), 2017-08-14
Supplement: 40168_2017_314_MOESM13_ESM.pdf [file 40168_2017_314_MOESM13_ESM.pdf]

### A. No normalization

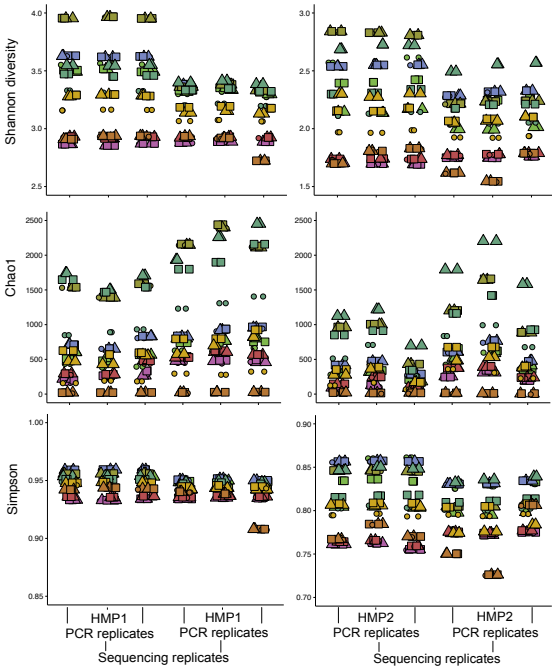

### B. Rarefaction to minimum sequence depth

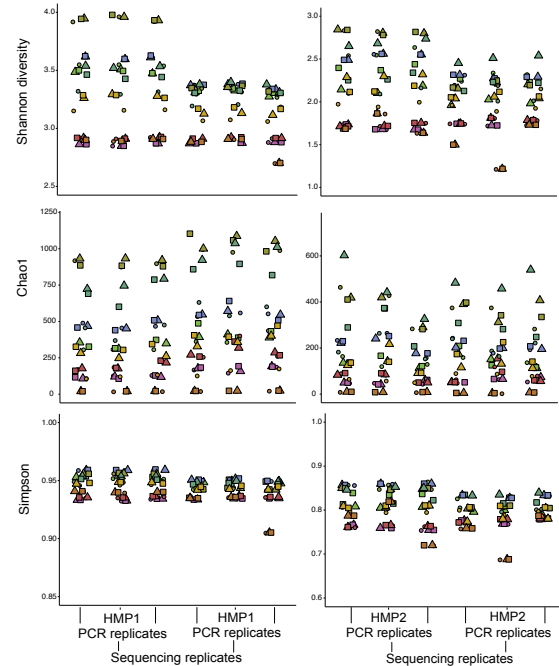

**OTU Picking Approach** ■ AbundantOTU ■ BLAST ■ cdhit ■ dnacust ■ UCLUST ■ UCLUST-ref ■ UCLUST-ref-strict ■ UPARSE

**Taxonomic Database** ○ Greengenes 2011 △ Greengenes 2013 □ Silva 111
